# Supplementary figures and images for: Low-temperature Conversion of Fe-rich Sludge to KFeS2 Whisker: a New Flocculant Synthesis From Laboratory Scale to Pilot Scale
Source: Research Square preprint supplement (doi:10.21203/rs.3.rs-221193/v1), 2021-02-23

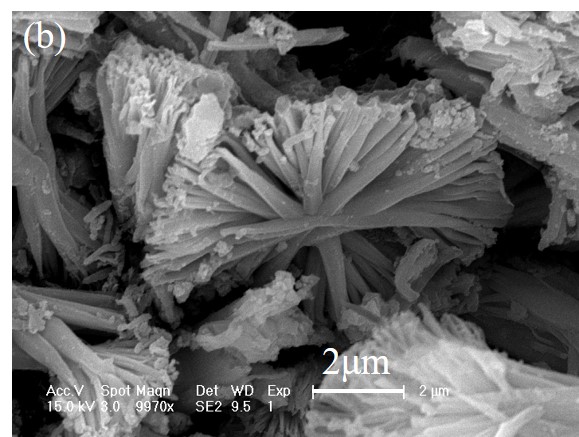


Fig. S1 (a) XRD pattern and (b) SEM image of wet P80-24 by freeze-dried after one week of storage.

Supplement: Supplementary file 1 [file a17f93a11d339814b72520d8.docx]
